# Supplementary material
Source: PubMed Central journal article supplement (PMC4104687)
Supplement: NIHMS599089-supplement-01.pdf [file NIHMS599089-supplement-01.pdf]

**TABLES:****Table 1 (supplemental): Demographics and tumor histology**

|                                                   | Numbers     | %    |
|---------------------------------------------------|-------------|------|
| <b>Patients</b>                                   | <b>33</b>   |      |
| Age, median and range at diagnosis (years, range) | 56 (28-81)  |      |
| Weight (kg, range)                                | 68 (45-123) |      |
| <b>Prior Therapy:</b>                             |             |      |
| Pelvic radiation therapy                          | 32          | 96.9 |
| Chemo therapy                                     | 23          | 69.7 |
| <b>Indication for Surgery</b>                     |             |      |
| - Persistent disease                              | 10          | 30.3 |
| - Recurrent disease                               | 23          | 69.7 |
| <b>Pelvic surgery:</b>                            |             |      |
| - Total exenteration                              | 21          | 63.6 |
| - Anterior exenteration                           | 10          | 30.3 |
| - Posterior exenteration                          | 2           | 6.1  |
| <b>Primary tumor site:</b>                        |             |      |
| <b>Cervical cancer histology:</b>                 | <b>18</b>   |      |
| • Squamous cell carcinoma                         | 6           | 33.3 |
| • Adenocarcinoma                                  | 10          | 55.6 |
| • Adenosquamous                                   | 1           | 5.6  |
| • Small cell cancer (neuroendocrine)              | 1           | 5.6  |
| <b>Uterine cancer histology:</b>                  | <b>8</b>    |      |
| • Endometrioid carcinoma                          | 3           | 37.5 |
| • Adenocarcinoma                                  | 3           | 37.5 |
| • Adenosarcoma                                    | 1           | 12.5 |
| • Malignant myoepithelioma                        | 1           | 12.5 |
| <b>Vaginal and vulvar cancer histology:</b>       | <b>7</b>    |      |
| • Squamous cell carcinoma                         | 6           | 85.7 |
| • Adenocarcinoma                                  | 1           | 14.3 |

**Table 3 (supplemental): FDG uptake metrics for both readers:**

| <b>FDG uptake metrics</b>   | <b>Median</b> | <b>Mean</b> | <b>SD</b> | <b>Range</b> |
|-----------------------------|---------------|-------------|-----------|--------------|
| <b>R1 SUV<sub>max</sub></b> | 6.9           | 10.4        | 14.8      | 2.5-89       |
| <b>R1 MTV (mL)</b>          | 10.1          | 16.5        | 16.1      | 1.3-62.2     |
| <b>R1 TLG (g)</b>           | 46            | 192.7       | 608       | 3.3-3520     |
| <b>R2 SUV<sub>max</sub></b> | 6.9           | 10.2        | 14.9      | 0-89.2       |
| <b>R2 MTV (mL)</b>          | 10.1          | 17.8        | 18.5      | 0-71.3       |
| <b>R2 TLG (g)</b>           | 42.8          | 201.1       | 610       | 0-3520       |
